# Supplementary material for: Identification of two types of GGAA-microsatellites and their roles in EWS/FLI binding and gene regulation in Ewing sarcoma
Source: PubMed Central journal article supplement (PMC5665490; doi:10.1371/journal.pone.0186275), 2017-11-01

# S1 Fig

A.

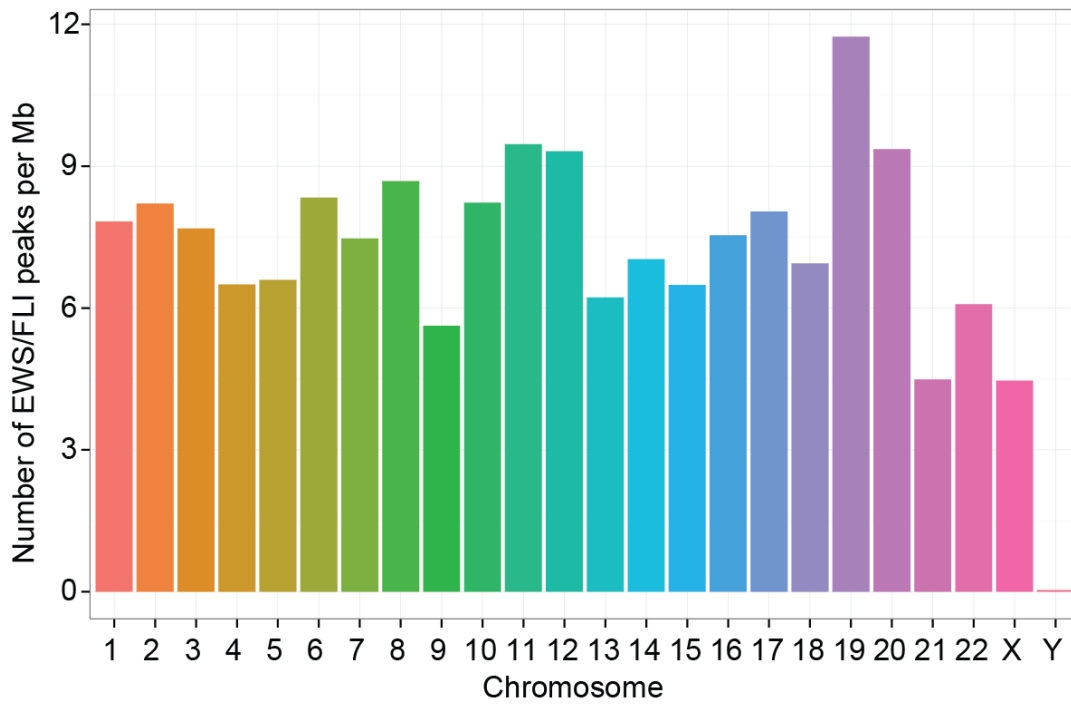

B.

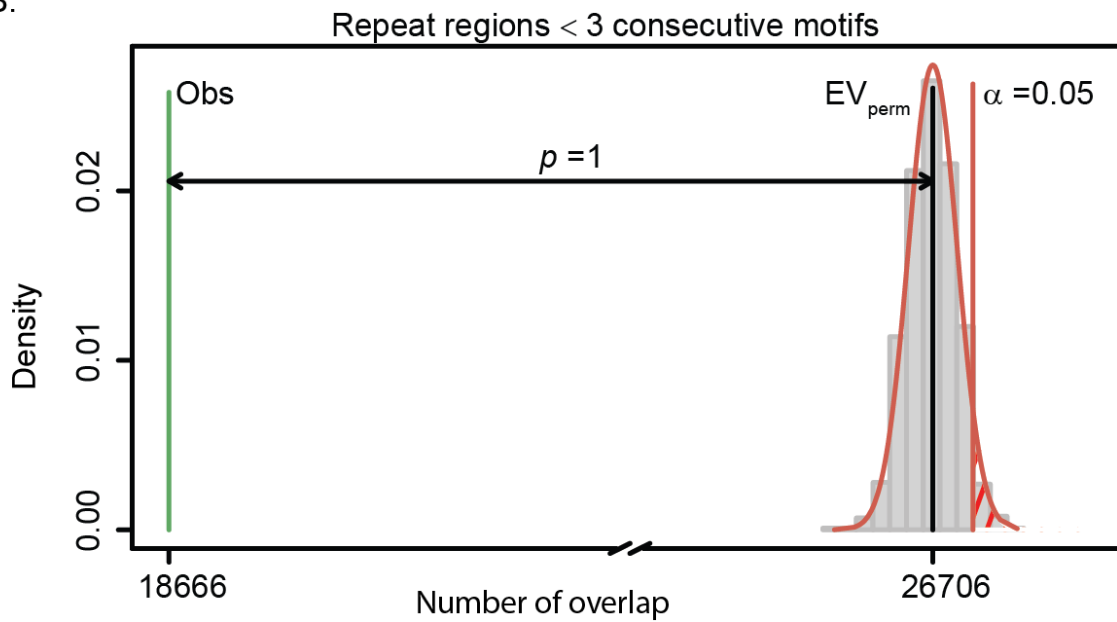

C.

Local z-score for repeat regions  $\geq 3$  consecutive motifs

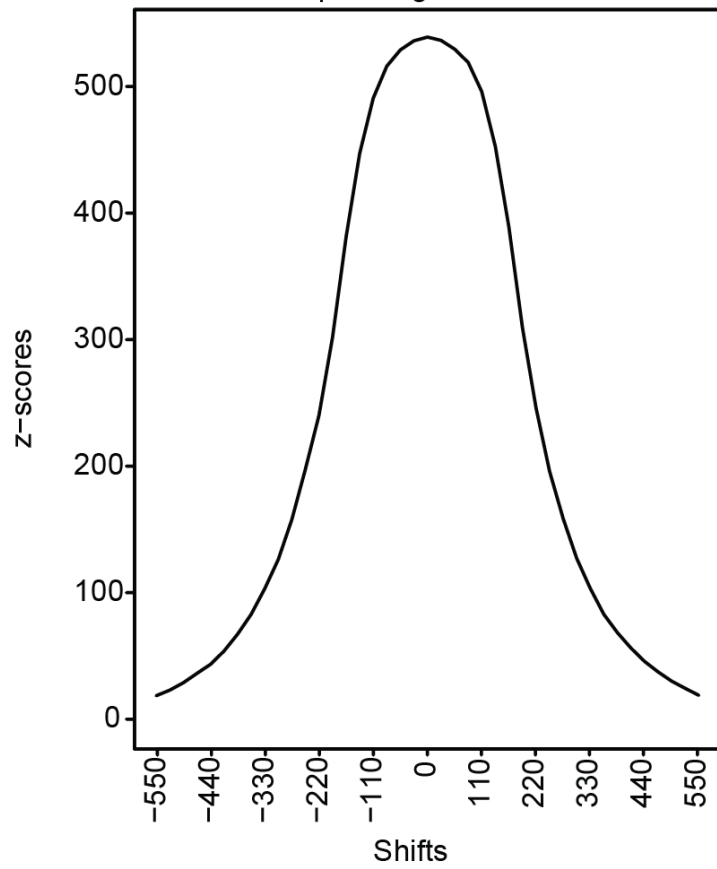

D.

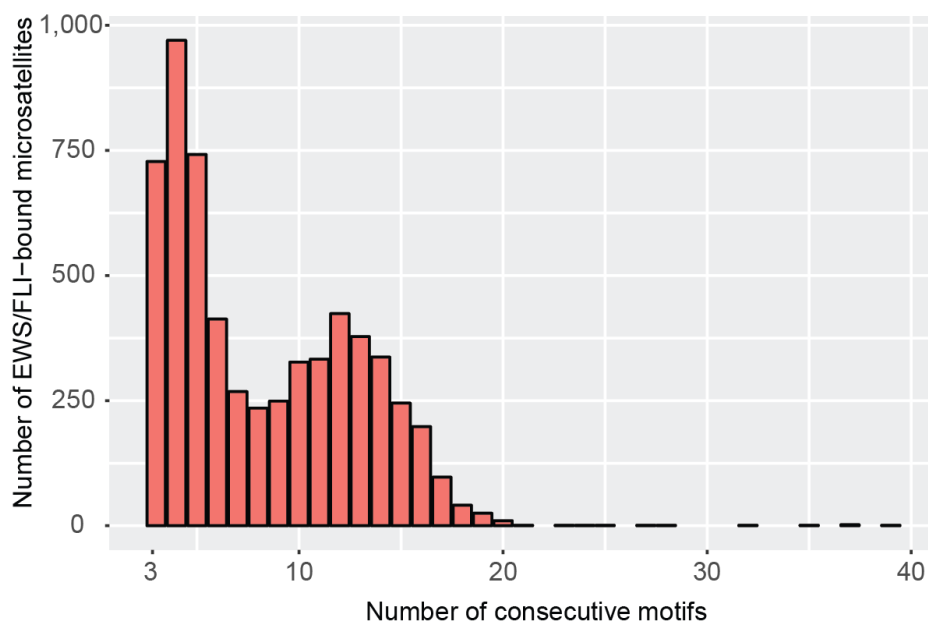

Supplement: pone.0186275.s001.pdf [file pone.0186275.s001.pdf]
