# Supplementary material for: Identification of two types of GGAA-microsatellites and their roles in EWS/FLI binding and gene regulation in Ewing sarcoma
Source: PubMed Central journal article supplement (PMC5665490; doi:10.1371/journal.pone.0186275), 2017-11-01

# S7 Fig

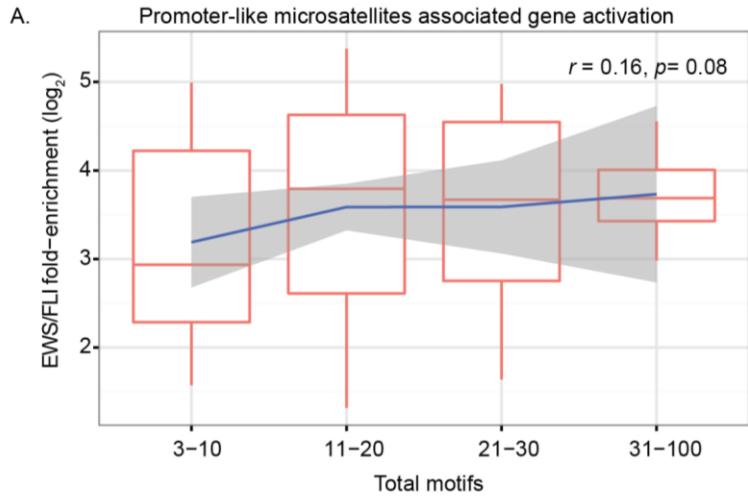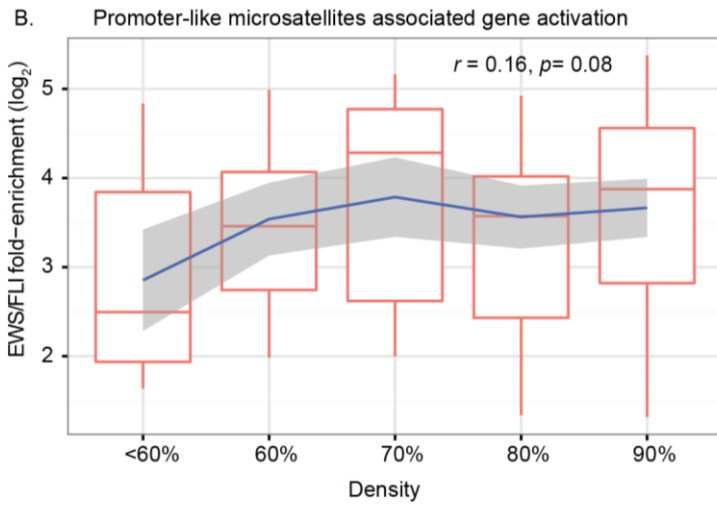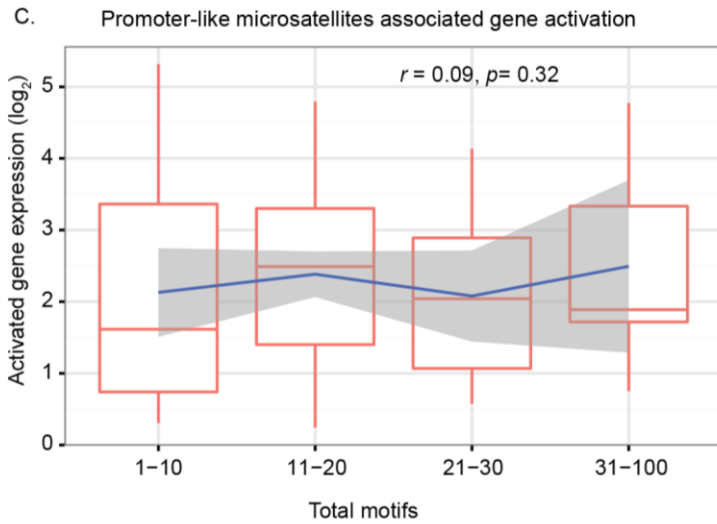

D. Correlation between EWS/FLI binding intensities and consecutive motifs in SKNMC cells

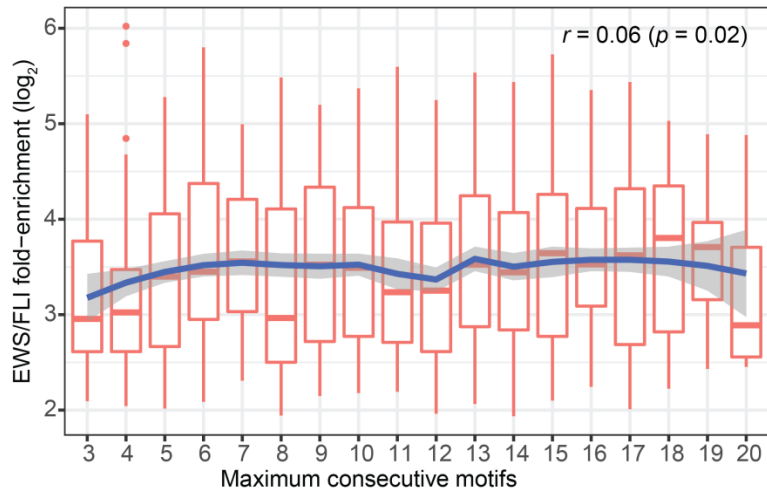

Supplement: pone.0186275.s007.pdf [file pone.0186275.s007.pdf]
