# Supplementary material for: Identification of two types of GGAA-microsatellites and their roles in EWS/FLI binding and gene regulation in Ewing sarcoma
Source: PubMed Central journal article supplement (PMC5665490; doi:10.1371/journal.pone.0186275), 2017-11-01

# S11 Fig

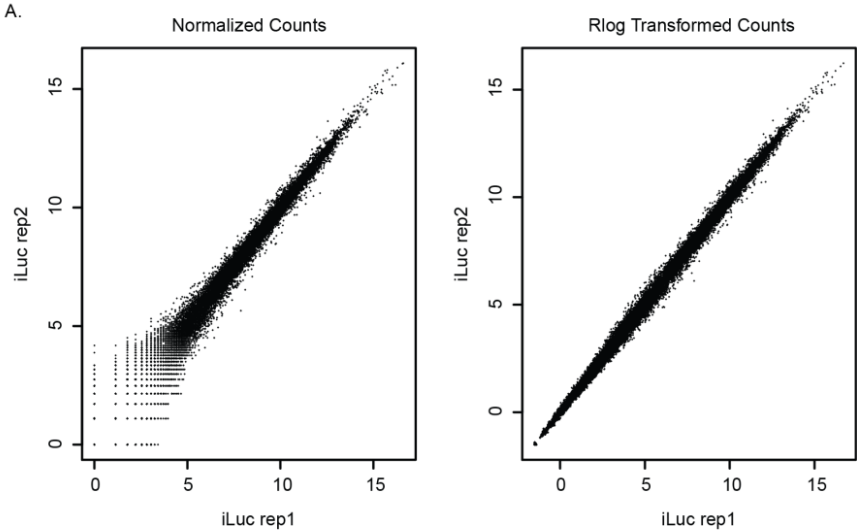

B. Heatmap of sample-to-sample distances using rlog-transformed counts

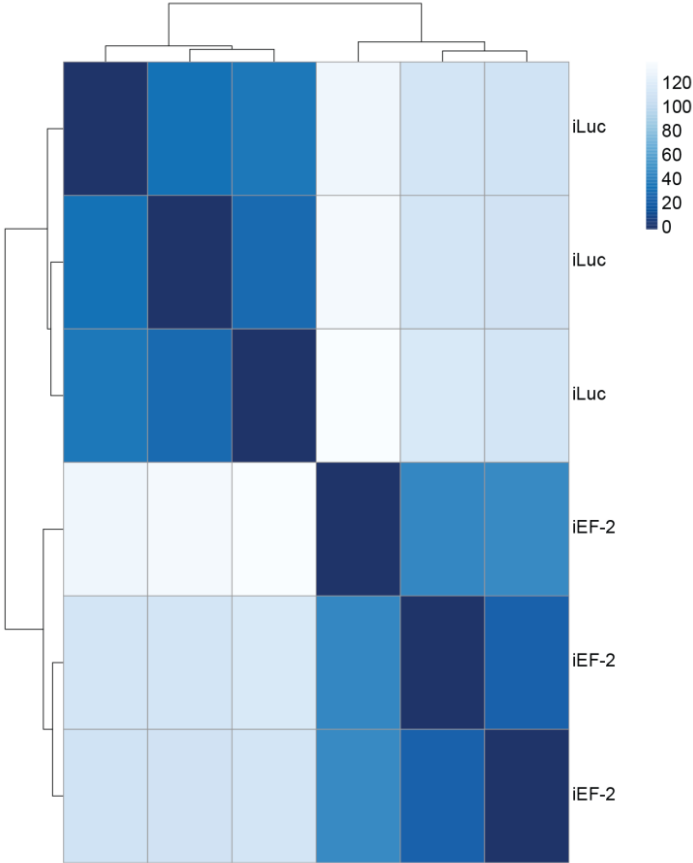

Supplement: pone.0186275.s011.pdf [file pone.0186275.s011.pdf]
