# Supplementary material for: Identification of two types of GGAA-microsatellites and their roles in EWS/FLI binding and gene regulation in Ewing sarcoma
Source: PubMed Central journal article supplement (PMC5665490; doi:10.1371/journal.pone.0186275), 2017-11-01
Supplement: pone.0186275.s014.pdf [file pone.0186275.s014.pdf]

**S3 Table. Correlation between microsatellites, EWS/FLI binding enrichment and EWS/FLI-repressed genes.**

|                                                                         |                |
|-------------------------------------------------------------------------|----------------|
| <b>Number of microsatellites</b>                                        | <b>6031</b>    |
| Corr. of peak fold change and number of consecutive motifs, r (p-value) | 0.46 (2.2e-16) |
| Corr. of peak fold change and total number of motifs, r (p-value)       | 0.23 (2.2e-16) |
| <b>Repressed genes</b>                                                  |                |
| Number of genes                                                         | 400            |
| Number of microsatellites                                               | 477            |
| Corr. of gene expression and peak fold change r (p-value)               | -0.03 (0.51)   |
| Corr. of peak fold change and number of consecutive motif, r (p-value)  | 0.39 (2.2e-16) |
| Corr. of peak fold change and total number of motif, r (p-value)        | 0.21 (3.1e-06) |
| Corr. of gene expression and number of consecutive motif r (p-value)    | -0.06 (0.21)   |
| Corr. of gene expression and number of total motif r (p-value)          | -0.02 (0.62)   |
| <b>Promoter-like microsatellites</b>                                    |                |
| Number of genes                                                         | 49             |
| Number of microsatellites                                               | 52             |
| Corr. of gene expression and peak fold change, r (p-value)              | 0.12 (0.41)    |
| Corr. of peak fold change and number of consecutive motif, r (p-value)  | 0.18 (0.19)    |
| Corr. of peak fold change and total number of motif, r (p-value)        | 0.06 (0.66)    |
| Corr. of gene expression and number of consecutive motif, r (p-value)   | -0.22 (0.12)   |
| Corr. of gene expression and total number of motif, r (p-value)         | -0.04 (0.79)   |
| <b>Enhancer-like microsatellites</b>                                    |                |
| Number of genes                                                         | 357            |
| Number of microsatellites                                               | 425            |
| Corr. of gene expression and peak fold change, r (p-value)              | -0.05 (0.33)   |
| Corr. of peak fold change and number of consecutive motif, r (p-value)  | 0.40 (2.2e-16) |
| Corr. of peak fold change and total number of motif, r (p-value)        | 0.22 (3.0e-6)  |
| Corr. of gene expression and number of consecutive motif, r (p-value)   | -0.04 (0.43)   |
| Corr. of gene expression and total number of motif, r (p-value)         | -0.02 (0.68)   |
