# Supplementary material for: Identification of two types of GGAA-microsatellites and their roles in EWS/FLI binding and gene regulation in Ewing sarcoma
Source: PLoS One. 2017 Nov 1;12(11):e0186275. doi: 10.1371/journal.pone.0186275 (PMC5665490; doi:10.1371/journal.pone.0186275)
Supplement: S1 Table — (PDF) [file pone.0186275.s012.pdf]

**S1 Table. Examples of mixed repeat regions (repeat regions that contain both GGAA and TTCC motifs).**

|    | Genomic location (hg19)           | Sequence                                                                                                                                                                       |
|----|-----------------------------------|--------------------------------------------------------------------------------------------------------------------------------------------------------------------------------|
| 1. | chr1:199,130,087-<br>199,130,206  | TTCCTTCCAAAGGAAGGAAGGGAGGGAGGGAGG<br>AAGGAAGGAAGGAAGGAAGAAGGAAGGAAGGA<br>AGGAAGGAAGGAAGGAAGGAAGAAGGAAGGAA<br>GGAAGGAAGGAAGGAAGGAAGGAA                                          |
| 2. | chr4: 34,658,583-<br>34,658,655   | TTCCTTCC TCAGGAAAGGACCTTTGGGCAGCAAG<br>GAAGGAAGGAAGGAAGGAAGGAAAGAAGGAAG<br>AAAGGAA                                                                                             |
| 3. | chr22: 45,138,923 -<br>45,138,773 | GGAAGGGAGGGAGGGA GGAAGGAAGGAAAGG<br>AAGGAAGGGAGGGACGAAGGGAGGAAGGAGAA<br>AGAAA GGAAAGAAA GGAAAGATAGAGAA GGAAAG<br>GAAAGGAGAGA GGAAGGACTCCTTCCTTCC TT<br>GCAGTCCCTGTAGCTGCT TTCC |
| 4. | chrY: 7,311,313- 7,311,439        | GGAAATATGATTCTG GGAAGGAATTCCTTCCTTC<br>CTTCCTTCCTTCCTTCCTTCCTTCCTTCCTTCCTT<br>ATTCCTTCCTTCCTTCCTTCCTTCCTTATTTCCTT<br>CCTTCCTTCCTCCCACCTTCC                                     |
| 5. | chr18: 30,686,220-<br>30,686,285  | TTCCTTCCTTCCTTGCAAGTTCC TCCTTTCAATT<br>CCCAAGAAAATAAAGAAA GGAAGGAAGGAA                                                                                                         |
