# Supplementary material for: Identification of two types of GGAA-microsatellites and their roles in EWS/FLI binding and gene regulation in Ewing sarcoma
Source: PLOS journal article supplement (doi:10.1371/journal.pone.0186275), 2017-11-01
Supplement: S13 (10.1371/journal.pone.0186275.s013) [file journal.pone.0186275.s013]

**S2 Table. Correlation between microsatellites and EWS/FLI binding enrichment and EWS/FLI-activated genes.**

|                                                                         |                 |
|-------------------------------------------------------------------------|-----------------|
| <b>Number of microsatellites</b>                                        | <b>6,031</b>    |
| Corr. of peak fold change and number of consecutive motifs, r (p-value) | 0.46 (2.2e-16)  |
| Corr. of peak fold change and total number of motifs, r (p-value)       | 0.23 (2.2e-16)  |
| <b>Activated genes</b>                                                  |                 |
| Number of genes (n)                                                     | 533             |
| Number of microsatellites (n)                                           | 694             |
| Corr. of gene expression and peak fold change, r (p-value)              | 0.21 (1.6e-08)  |
| Corr. of peak fold change and number of consecutive motif, r (p-value)  | 0.52 (2.2e-16)  |
| Corr. of peak fold change and total number of motif, r (p-value)        | 0.24 (1.9e-10)  |
| Corr. of gene expression and number of consecutive motif, r (p-value)   | 0.12 (1.5e-03)  |
| Corr. of gene expression and total number of motif, r (p-value)         | 0.11 (5.0e-03)  |
| <b>Promoter-like microsatellites</b>                                    |                 |
| Number of genes (n)                                                     | 113             |
| Number of microsatellites (n)                                           | 114             |
| Corr. of gene expression and peak fold change, r (p-value)              | 0.46 (3.3e-07)  |
| Corr. of peak fold change and number of consecutive motif, r (p-value)  | 0.43 (1.5e-06)  |
| Corr. of peak fold change and total number of motif, r (p-value)        | 0.16 (0.08)     |
| Corr. of gene expression and number of consecutive motif, r (p-value)   | 0.23 (0.01)     |
| Corr. of gene expression and total number of motif, r (p-value)         | 0.09 (0.32)     |
| <b>Enhancer-like microsatellites</b>                                    |                 |
| Number of genes (n)                                                     | 440             |
| Number of microsatellites (n)                                           | 580             |
| Corr. of gene expression and peak fold change, r (p-value)              | 0.15 (3.5e-04)  |
| Corr. of peak fold change and number of consecutive motif, r (p-value)  | 0.53 (2.2e-16)  |
| Corr. of peak fold change and total number of motif, r (p-value)        | 0.25 (1.28e-09) |
| Corr. of gene expression and number of consecutive motif, r (p-value)   | 0.07 (0.08)     |
| Corr. of gene expression and total number of motif, r (p-value)         | 0.10 (0.02)     |
